# Supplementary material for: Coping as a Mediator and Moderator between Psychological Distress and Disordered Eating Behaviors and Weight Changes during the COVID-19 Pandemic
Source: MDPI journal article supplement (doi:10.3390/ijerph20032504), 2023-01-31
Supplement: s1 [file s1]

## Supplementary material

| Y<br>Coping strategy | X<br>Psych. Distress /<br>Disordered<br>eating | General Interpretation of the moderator effect of Y in the causal relationship<br>$X \rightarrow \text{Weight change}$<br>(using model estimates and graphical representations)                                                                                                                                                                                                                                                                                                                                                                                                                                                                                                                                                                                 |
|----------------------|------------------------------------------------|-----------------------------------------------------------------------------------------------------------------------------------------------------------------------------------------------------------------------------------------------------------------------------------------------------------------------------------------------------------------------------------------------------------------------------------------------------------------------------------------------------------------------------------------------------------------------------------------------------------------------------------------------------------------------------------------------------------------------------------------------------------------|
| Planning             | Anxiety                                        | <b>(I)</b> For lower levels of Y, higher levels of X are associated with higher weight gains. However, increasing simultaneously X and Y is associated with weight loss. Thus, as levels of Y increase, the harmful effect of X on weight decreases. This means that these coping strategies benefited people with anxiety, stress, and disordered eating (global, weight concern, restraint) symptomatology to preserve or lose weight, in general.                                                                                                                                                                                                                                                                                                            |
| Positive reframing   | Anxiety                                        |                                                                                                                                                                                                                                                                                                                                                                                                                                                                                                                                                                                                                                                                                                                                                                 |
|                      | Stress                                         |                                                                                                                                                                                                                                                                                                                                                                                                                                                                                                                                                                                                                                                                                                                                                                 |
|                      | EDE global<br>Weight concern<br>Restraint      |                                                                                                                                                                                                                                                                                                                                                                                                                                                                                                                                                                                                                                                                                                                                                                 |
| Acceptance           | Restraint                                      | <b>(II)</b> The simultaneous increase of restraint and acceptance is associated with weight loss. This means that this coping strategy helped people with high levels of restraint to lose weight.                                                                                                                                                                                                                                                                                                                                                                                                                                                                                                                                                              |
| Denial               | Weight concern                                 | <b>(III)</b> The simultaneous increase of X and Y is associated with weight gain. This means that these coping strategies were harmful to people with disordered eating (global, weight and shape concerns).                                                                                                                                                                                                                                                                                                                                                                                                                                                                                                                                                    |
| Self-distraction     | EDE global<br>Shape concern                    |                                                                                                                                                                                                                                                                                                                                                                                                                                                                                                                                                                                                                                                                                                                                                                 |
|                      | Restraint                                      |                                                                                                                                                                                                                                                                                                                                                                                                                                                                                                                                                                                                                                                                                                                                                                 |
| Substance use        | EDE global<br>Eating concern<br>Weight concern | <b>(IV)</b> For low levels of self-distraction, greater restraint is associated with weight loss. The simultaneous increase in self-distraction and restraint is associated with weight gain. Thus, as self-distraction increases, greater restraint becomes associated with greater weight gain. This means that this coping was harmful to people with high levels of restraint.                                                                                                                                                                                                                                                                                                                                                                              |
|                      | Restraint                                      | <b>(V)</b> In general, both eating disorders (global, eating and weight concerns) and substance use are associated with weight gain. However, the simultaneous increase of both variables attenuates the harmful effect of on the weight. This means that substance use benefited people with high levels of disordered eating (global, eating and weight concerns). <sup>1</sup><br><br><b>(VI)</b> Higher substance use is associated with greater weight gain. However, the simultaneous increase in substance use and restraint is associated with weight loss. Thus, as restraint increases, greater substance use becomes associated with greater weight loss. This means that substance use benefited people with high levels of restraint. <sup>1</sup> |

# MODEL OUTPUTS

| Coping                      | Direct effect | Mediation effect | Moderator effect         |
|-----------------------------|---------------|------------------|--------------------------|
| Active coping               | --            |                  |                          |
| Planning                    |               |                  | -- (anxiety)             |
| Use of instrumental support | --            |                  |                          |
| Use of emotional support    |               |                  |                          |
| Religion                    |               |                  |                          |
| Positive reframing          | --            |                  | -- (anxiety, stress, DE) |
| Self-blame                  | ++            |                  |                          |
| Acceptance                  |               |                  | -- (restraint)           |
| Venting                     |               |                  |                          |
| Denial                      | ++            |                  | ++ (DE)                  |
| Self-distraction            | ++            |                  | ++ (DE)                  |
| Behavioral disengagement    | ++            | ++               |                          |
| Substance use               | ++            |                  | ++ (DE)                  |
| Humor                       |               |                  |                          |
| Coping                      | Direct effect | Mediation effect | Moderator effect         |
| Active coping               | --            |                  |                          |
| Planning                    |               |                  | -- (anxiety)             |
| Use of instrumental support | --            |                  |                          |
| Use of emotional support    |               |                  |                          |
| Religion                    |               |                  |                          |
| Positive reframing          | --            |                  | -- (anxiety, stress, DE) |
| Self-blame                  | ++            |                  |                          |
| Acceptance                  |               |                  | -- (restraint)           |
| Venting                     |               |                  |                          |
| Denial                      | ++            |                  | ++ (DE)                  |
| Self-distraction            | ++            |                  | ++ (DE)                  |
| Behavioral disengagement    | ++            | ++               |                          |
| Substance use               | ++            |                  | ++ (DE)                  |
| Humor                       |               |                  |                          |

#### # ANXIETY x ACTIVE COPING

```
      Estimate Std. Error z value Pr(>|z|)
(Intercept) -0.12623  0.16912 -0.746 0.45545
anx         0.53774  0.18272  2.943 0.00325 **
cope2       0.01366  0.10522  0.130 0.89669
anx:cope2   -0.24215  0.11157 -2.170 0.02998 *
---
```

#### # ANXIETY x PLANNING

```
      Estimate Std. Error z value Pr(>|z|)
(Intercept) -0.03571  0.16225 -0.220 0.82581
anx         0.53785  0.17342  3.101 0.00193 **
cope6       -0.03580  0.10011 -0.358 0.72063
anx:cope6   -0.32478  0.12443 -2.610 0.00905 **
---
```

#### # STRESS x USE OF INSTRUMENTAL SUPPORT

```
      Estimate Std. Error z value Pr(>|z|)
(Intercept) -0.19711  0.18803 -1.048 0.294500
stress      0.47393  0.14081  3.366 0.000764 ***
cope6       0.01381  0.11579  0.119 0.905062
stress:cope6 -0.24279  0.09788 -2.481 0.013119 *
---
```

#### # EDE GLOBAL x POSITIVE REFRAMING

```
      Estimate Std. Error z value Pr(>|z|)
(Intercept) -0.05916  0.15804 -0.374 0.708152
ede         0.29804  0.08670  3.438 0.000587 ***
cope6       -0.06304  0.10318 -0.611 0.541199
ede:cope6   -0.13605  0.06098 -2.231 0.025675 *
---
```

#### # WEIGHT CONCERN x POSITIVE REFRAMING

```
      Estimate Std. Error z value Pr(>|z|)
(Intercept) -0.06836  0.15882 -0.430 0.666886
ede_wc      0.23622  0.06803  3.472 0.000516 ***
cope6       -0.06494  0.10299 -0.631 0.528365
ede_wc:cope6 -0.10472  0.04723 -2.217 0.026604 *
---
```

#### # RESTRAINT x POSITIVE REFRAMING

```
      Estimate Std. Error z value Pr(>|z|)
(Intercept) 0.08121  0.15182  0.535 0.59273
ede_r       0.20630  0.08949  2.305 0.02115 *
cope6      -0.03131  0.09675 -0.324 0.74626
ede_r:cope6 -0.17452  0.05614 -3.109 0.00188 **
---
```

#### # RESTRAINT x ACCEPTANCE

```
      Estimate Std. Error z value Pr(>|z|)
(Intercept) 0.03321  0.16768  0.198 0.8430
ede_r       0.14693  0.09330  1.575 0.1153
cope8       0.01569  0.10441  0.150 0.8806
ede_r:cope8 -0.13578  0.05925 -2.292 0.0219 *
---
```

#### # WEIGHT CONCERN x DENIAL

|               | Estimate | Std. Error | z value | Pr(> z )  |
|---------------|----------|------------|---------|-----------|
| (Intercept)   | -0.08011 | 0.11037    | -0.726  | 0.4679    |
| ede_wc        | 0.01889  | 0.05001    | 0.378   | 0.7057    |
| cope10        | -0.20425 | 0.19461    | -1.050  | 0.2939    |
| ede_wc:cope10 | 0.14645  | 0.05615    | 2.608   | 0.0091 ** |

---

#### # EDE GLOBAL x SELF-DISTRACTION

|             | Estimate | Std. Error | z value | Pr(> z ) |
|-------------|----------|------------|---------|----------|
| (Intercept) | -0.06881 | 0.13785    | -0.499  | 0.6177   |
| ede         | -0.05744 | 0.09801    | -0.586  | 0.5578   |
| cope11      | -0.05631 | 0.11675    | -0.482  | 0.6296   |
| ede:cope11  | 0.12775  | 0.06065    | 2.106   | 0.0352 * |

---

#### # SHAPE CONCERN x SELF-DISTRACTION

|               | Estimate | Std. Error | z value | Pr(> z ) |
|---------------|----------|------------|---------|----------|
| (Intercept)   | -0.08308 | 0.13780    | -0.603  | 0.5466   |
| ede_sc        | -0.02008 | 0.07529    | -0.267  | 0.7896   |
| cope11        | -0.11988 | 0.12037    | -0.996  | 0.3193   |
| ede_sc:cope11 | 0.11624  | 0.04854    | 2.394   | 0.0166 * |

---

#### # RESTRAINT x SELF-DISTRACTION

|              | Estimate | Std. Error | z value | Pr(> z ) |
|--------------|----------|------------|---------|----------|
| (Intercept)  | 0.03805  | 0.13320    | 0.286   | 0.7751   |
| ede_r        | -0.22967 | 0.09307    | -2.468  | 0.0136 * |
| cope11       | 0.04678  | 0.10919    | 0.428   | 0.6683   |
| ede_r:cope11 | 0.13106  | 0.06010    | 2.181   | 0.0292 * |

---

#### # EDE GLOBAL x SUBSTANCE USE

|             | Estimate | Std. Error | z value | Pr(> z )     |
|-------------|----------|------------|---------|--------------|
| (Intercept) | -0.23331 | 0.09566    | -2.439  | 0.014726 *   |
| ede         | 0.15777  | 0.05661    | 2.787   | 0.005321 **  |
| cope13      | 0.92115  | 0.27568    | 3.341   | 0.000834 *** |
| ede:cope13  | -0.23626 | 0.08867    | -2.665  | 0.007710 **  |

---

#### # EATING CONCERN x SUBSTANCE USE
